# Supplementary material
Source: publisher figshare collection journal article supplement (https://acs.figshare.com/ndownloader/files/24166088)
Supplement: Supplementary file 1 [file 24166088]

## Supporting Information

# Structural changes in cell wall and cell membrane organic materials following exposure to free nitrous acid

*Mariella Chislett<sup>a</sup>, Jianhua Guo<sup>a</sup>, Philip L. Bond<sup>a</sup>, Alun Jones<sup>b</sup>, Zhiguo Yuan<sup>a\*</sup>*

<sup>a</sup> Advanced Water Management Centre (AWMC), The University of Queensland, QLD 4072, Australia

<sup>b</sup> Institute for Molecular Bioscience (IMB), The University of Queensland, QLD 4072, Australia

---

\* Corresponding author.

*Zhiguo Yuan, Level 4 Gehrmann Building, Advanced Water Management Centre, The University of Queensland, St. Lucia, Brisbane, QLD 4072, Australia*

E-mail address: z.yuan@awmc.uq.edu.au

Number of pages: 15

Number of tables: 1

Number of Figures: 19

## 1 Materials and Methods

2

| Cell membrane materials            | Category               | Key function                                                                                                                            |
|------------------------------------|------------------------|-----------------------------------------------------------------------------------------------------------------------------------------|
| Cellulose <sup>(S1)</sup>          | Cell wall material     | Cellulose is found in biofilms and cell walls. It is an important structural component in primary cell walls of algae and green plants. |
| Lipopolysaccharide <sup>(S2)</sup> | Cell membrane material | Contribute to the integrity of the outer membrane and protect the cell against (lipophilic) antibiotics <sup>1</sup>                    |
| Peptidoglycan <sup>(S3)</sup>      | Cell wall material     | Forms a mesh like layer in the cell wall, contributes to cell strength.                                                                 |
| Plasmalogen <sup>(S4)</sup>        | Cell membrane material | Type of phospholipid. Phospholipids form bilayers and contribute to the structure and integrity of cell membranes.                      |
| Lipoteichoic acid <sup>(S5)</sup>  | Cell wall material     | Crucial components of the cell envelope and provide control over the rigidity and porosity                                              |

|  |  |                                                                        |
|--|--|------------------------------------------------------------------------|
|  |  | of the cell wall and influence the bacterium's morphology <sup>2</sup> |
|--|--|------------------------------------------------------------------------|

**Table S1 Description of the cell envelope materials chosen to represent key cell wall and cell membrane molecules found in microbial cell envelopes. The ‘category’ corresponds to the location in the cell envelope (cell wall or cell membrane). The ‘key function’ describes the cell envelope material’s unique role in the function of the cell envelope and the overall function of the cell.**

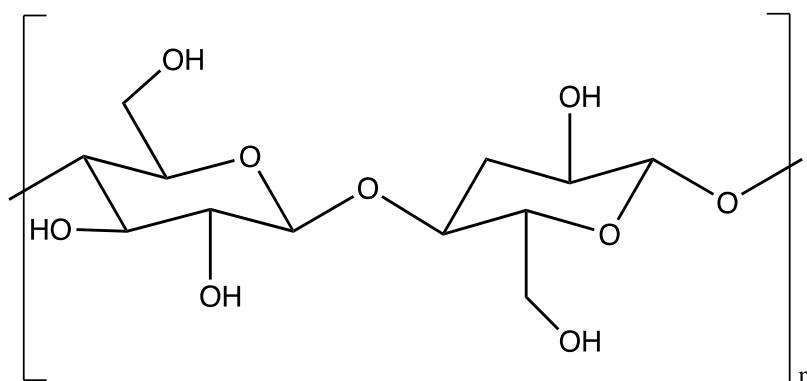

**Figure S1. Cellulose molecular structure of a single cellulose unit.**

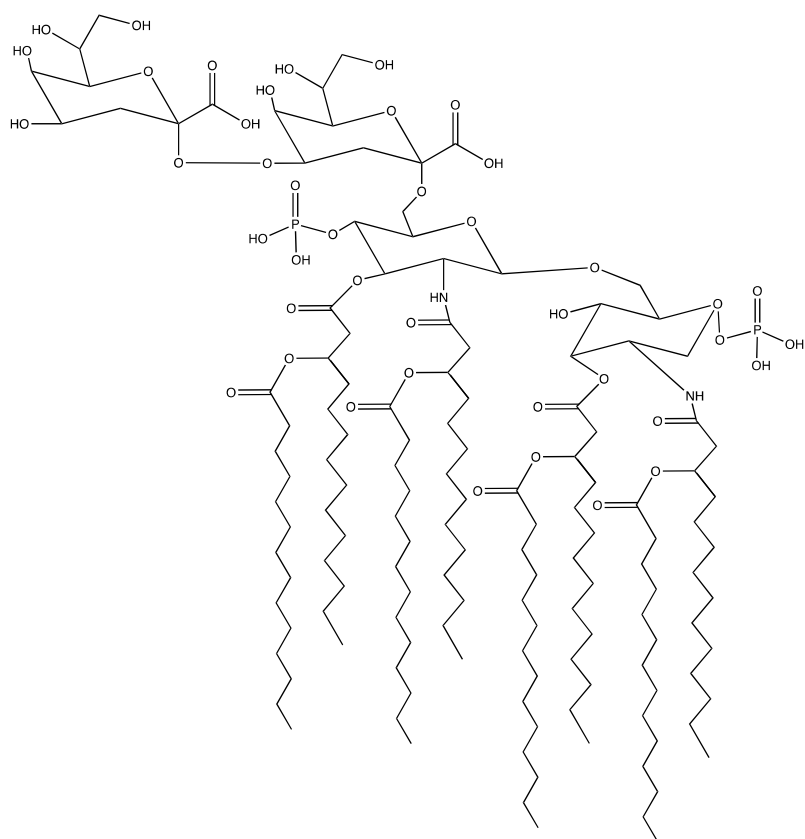

**Figure S2. Lipopolysaccharide molecular structure**

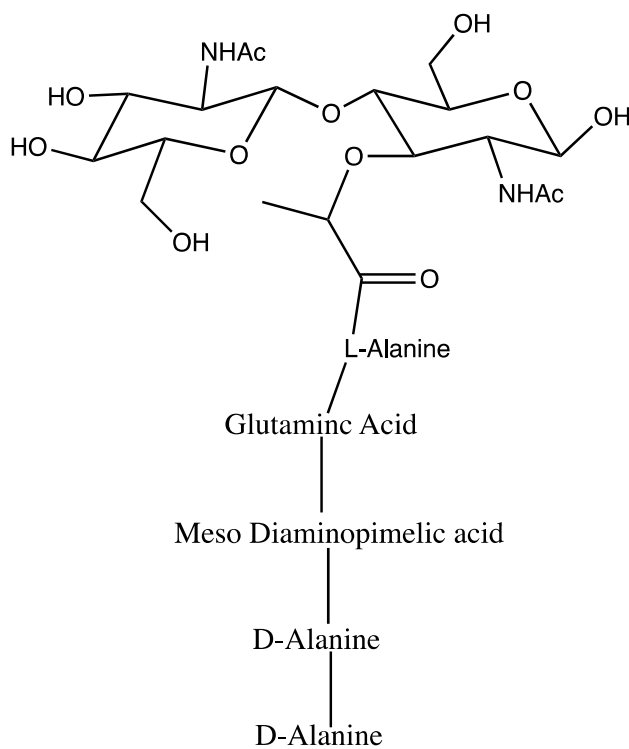

**Figure S3. Peptidoglycan molecular structure**

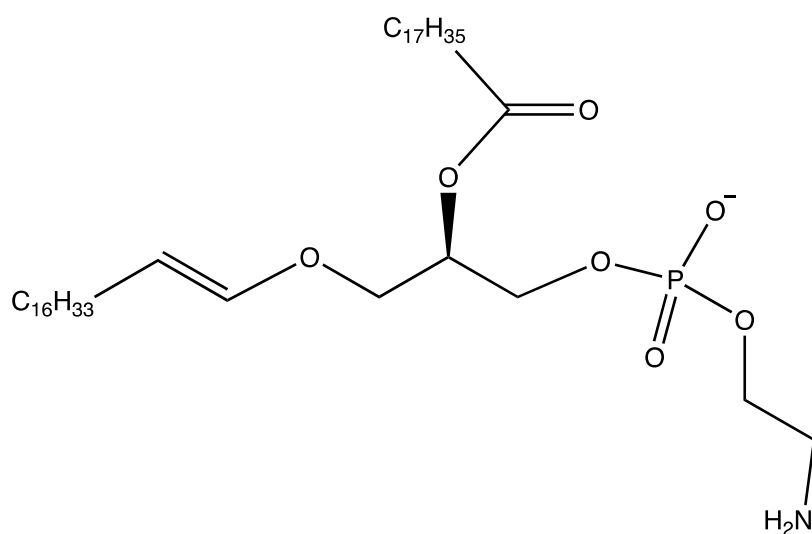

**Figure S4. Plasmalogen molecular structure**

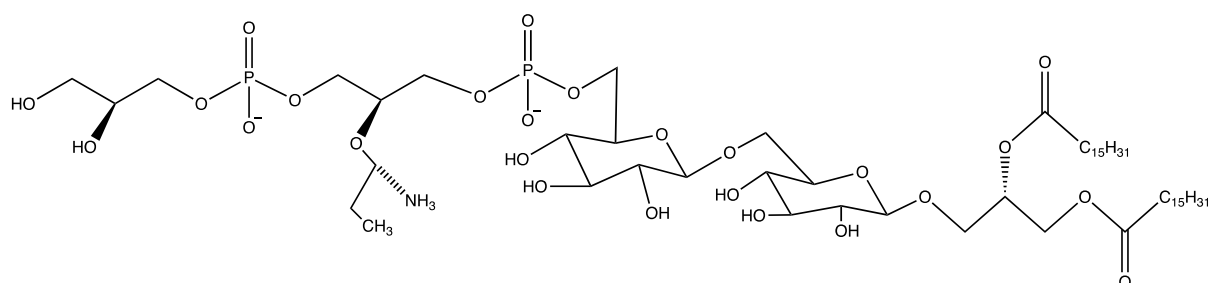

**Figure S5. Lipoteichoic Acid molecular structure**

## Results and Discussion

29

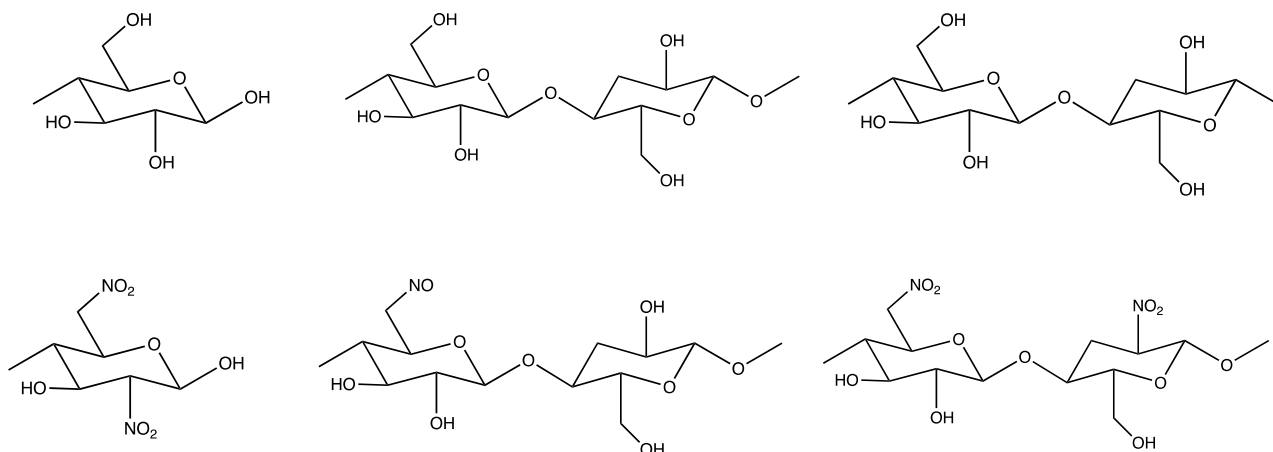

30

31 **Figure S6. Cellulose breakdown products**

32

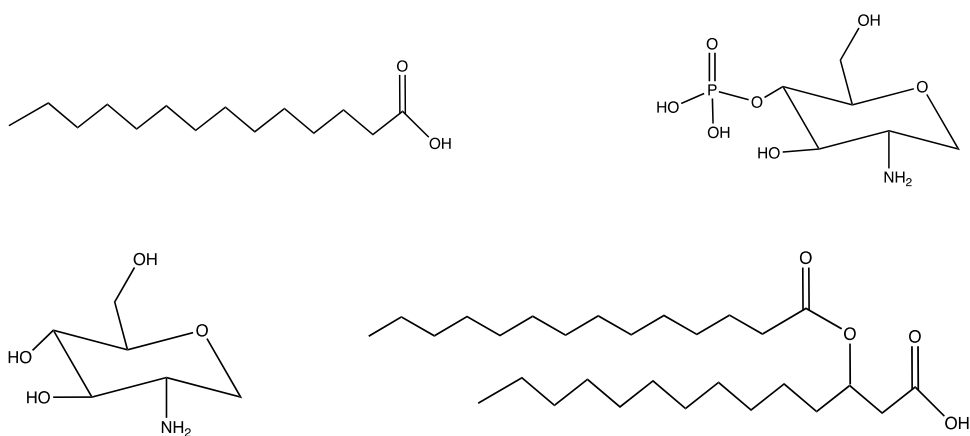

33

34

35 **Figure S7. Lipopolysaccharide breakdown products**

36

37

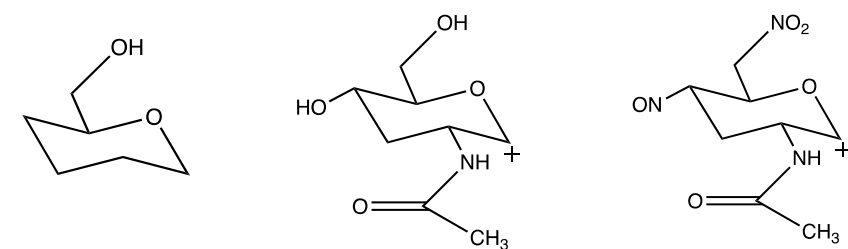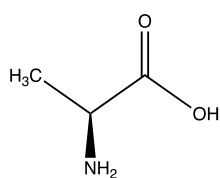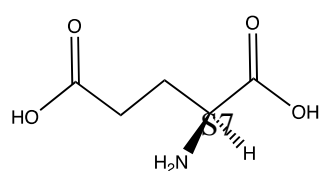

Meso Diaminopimelic acid  
|  
D-Alanine

38

39

40 **Figure S8. Peptidoglycan breakdown products**

41

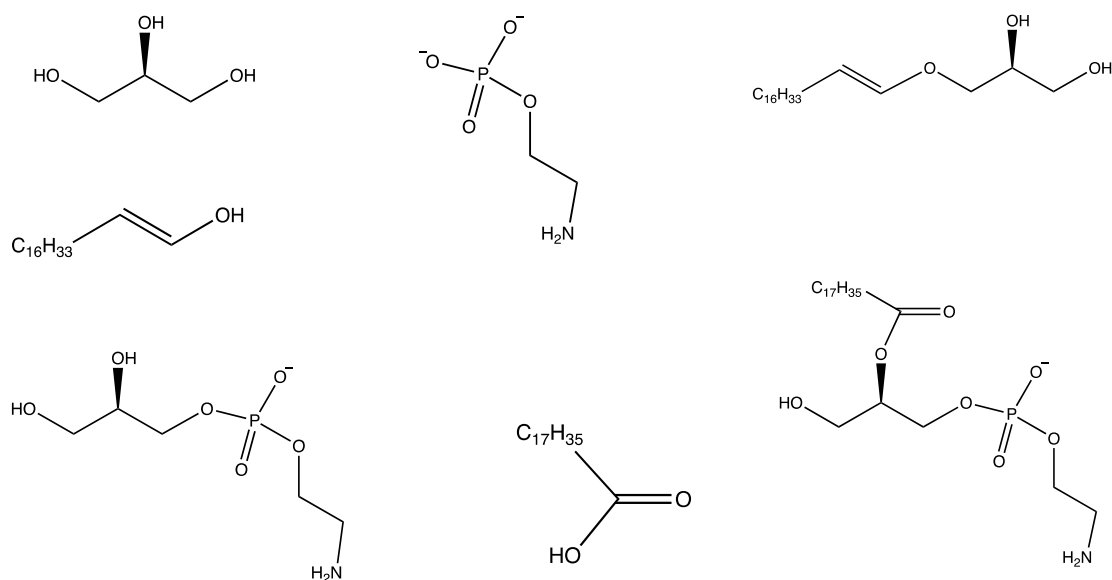

42

43

44 **Figure S9. Plasmalogen breakdown products**

45

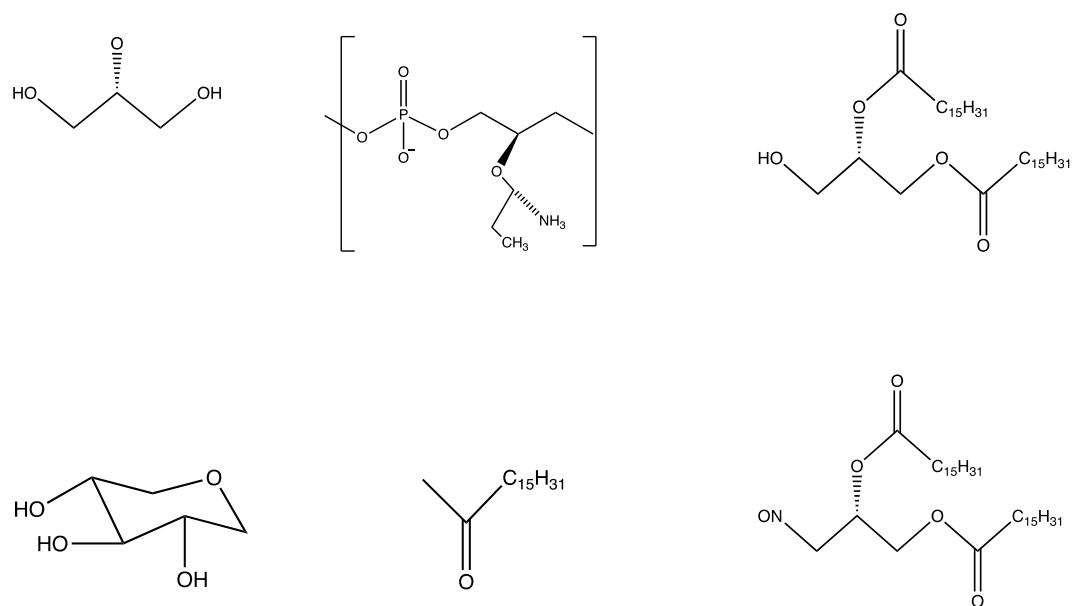

46



## Figure S10. Lipoteichoic acid breakdown products

### Equations S1-S5, Functional groups targeted by FNA

There are a number of functional groups targeted by FNA, (Eq. S1-S5) these include; carboxylic acids Eq. (1), amines Eq. (2), alcohols Eq. (3), phenols Eq. (4) and benzene rings Eq. (5).

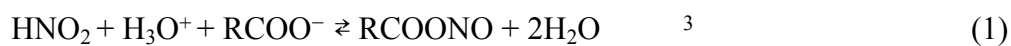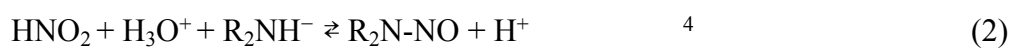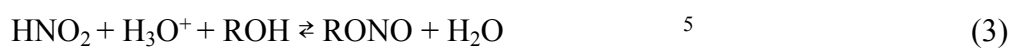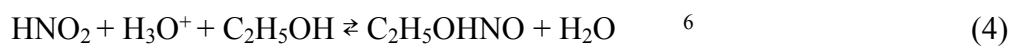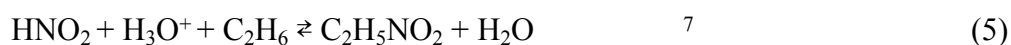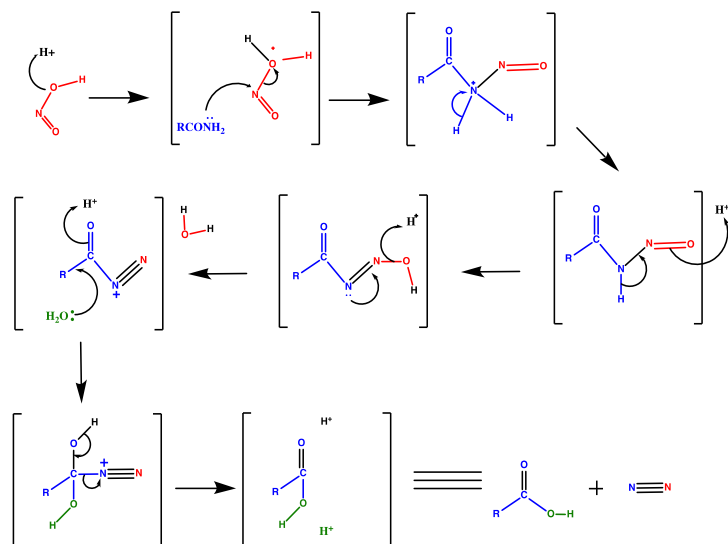

65

66 **Figure S11. Reaction schematic of FNA with amides**

67

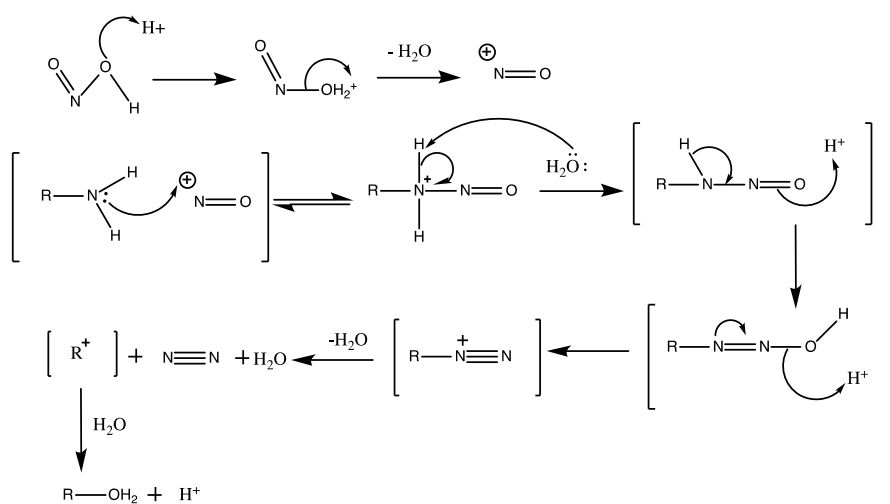

68

69 **Figure S12. Reaction schematic of FNA with primary amines**

70

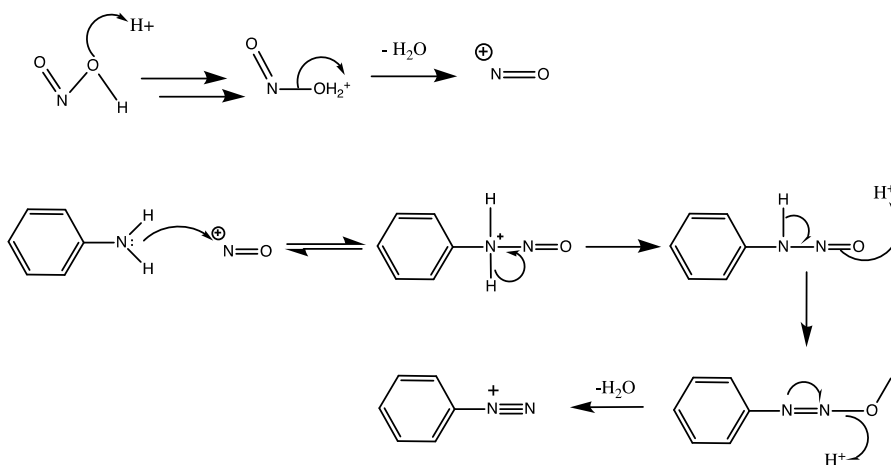

71

72

73 **Figure S13. Reaction schematic of FNA with primary amyl amines**

74

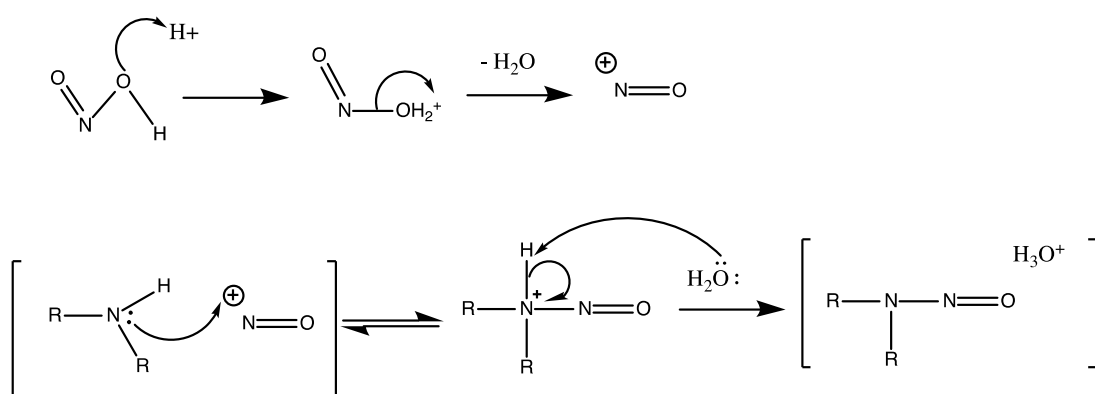

75

76 **Figure S14. Reaction schematic of FNA with secondary amines**

77

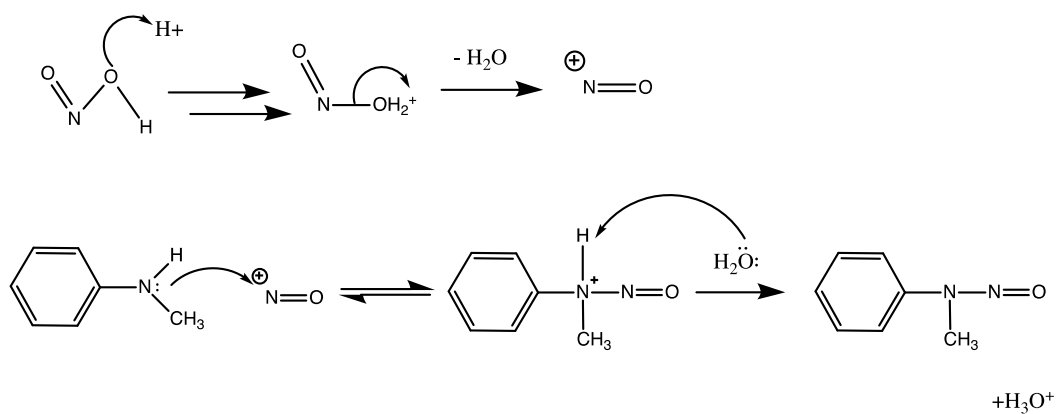

78

79 **Figure S15. Reaction schematic of FNA with secondary aryl amines**

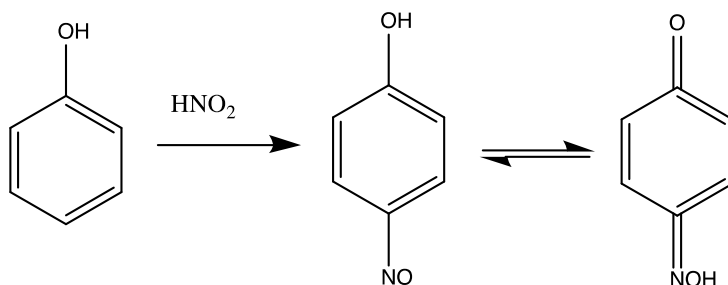

80

81 **Figure S16. Reaction schematic of FNA with phenols**

82

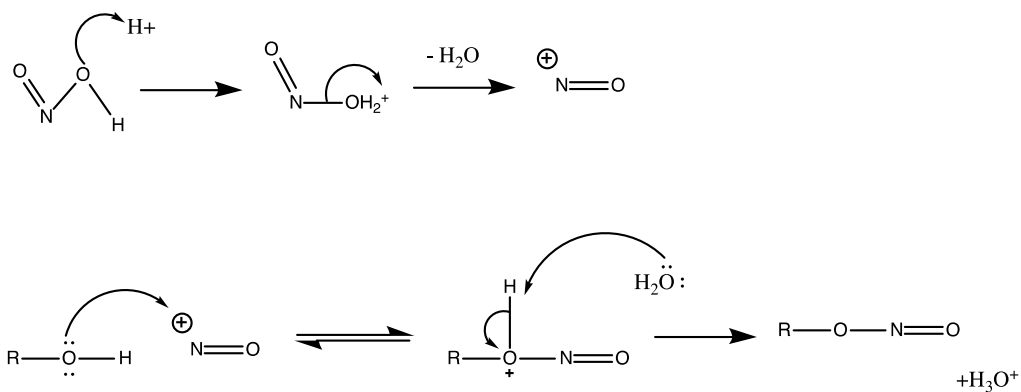

83

84 **Figure S17. Reaction schematic of FNA with primary alcohols**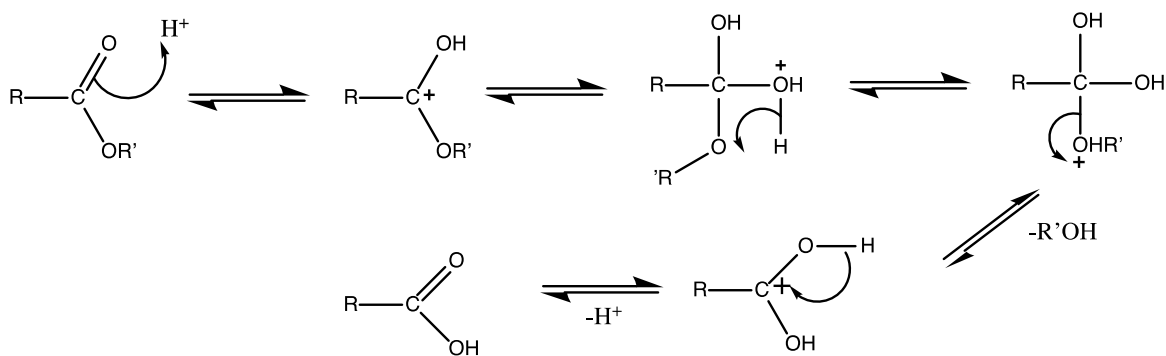

85

86 **Figure S18. Reaction schematic of FNA with esters**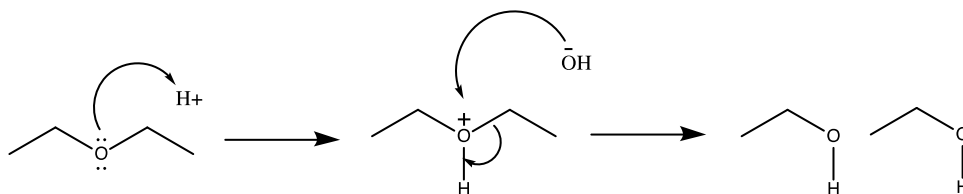

87

88 **Figure S19. Reaction schematic of FNA with ethers**

• **Supporting Information.**

Table S1 highlights the cell envelope materials used as representative envelope materials in this study and their function in the cell. Figure S1-S5 include the molecular structure of the cell envelope materials, highlighting the important structural bonds. In Figure S1, the R-O-R bonds represent ether linkages, which provide structural integrity to the cellulose polymer. Cellulose polymers can also bond to other cellulose polymers via hydrogen bonds between the OH groups. Figure S2 contains the chemical structure of lipopolysaccharide including the long chain lipid components, and the polysaccharide component. The polysaccharide is composed of O-antigen, outer core and inner core joined by covalent bonds; they are found in the outer membrane of Gram-negative bacteria. Figure S3 is the molecular structure of peptidoglycan from *Escherichia coli*. There is a pentapeptide bonded to the remaining structure via a lactyl group. Peptidoglycan is anchored to the inner membrane of Gram-negative bacteria through linkage to lipoproteins. The plasmalogen molecular structure in Figure S4 is a plasmenyl-phospholipid, which has an ether bond in position sn-1 to an alkenyl group <sup>8</sup>. Plasmalogens have been proposed to act as membrane antioxidants and reservoirs of polyunsaturated fatty acids as well as influence membrane dynamics <sup>9</sup>. LTAs molecular structure in Figure S5 has been found to have the strongest hydrophobic bonds in the entire bacteria <sup>10</sup>. This is because there is a presence of strong covalent ether, ester and phosphate bonding throughout the molecule. LTA is anchored to the cell membrane via a diglyceride bond <sup>11</sup>. It has antigenic properties being able to stimulate specific immune response.

Figure S6-S10 highlights the breakdown products that resulted from the reaction between FNA and the cell envelope materials and were identified from the ESI-MS spectra in the main text (Figure 1B-5B). Equations S1-S5 are the hypothesised equations for the reactions between FNA and the functional groups targeted by FNA that are present in the cell envelope materials.

Figure S11-19 are the reaction schematics for the reactions between FNA and the functional groups found in the cell envelope molecules.

## References

1. Mayer, H., Analysis of lipopolysaccharides of gram-negative bacteria. *Method. Microbiol.* **1985**, *18*, 157-207.
2. Silhavy, T. J.; Kahne, D.; Walker, S., The bacterial cell envelope. *Perspect. Biol.* **2010**, *2*, (5), 1-16.
3. Williams, D. L. H., *Nitrosation Reactions and the Chemistry of Nitrous Oxide*. Elsevier Science: Amsterdam, Netherlands, 2004.
4. Collins, C. J., Reactions of primary aliphatic amines with nitrous acid. *Acc. Chem. Res.* **1971**, *4*, (9), 315-322.
5. Noyes, W. A., n-Butyl Nitrite. *Org. Synth.* **1943**, *16*, (7), 108.
6. Pine, S. H., *Organic Chemistry*. 5th ed.; McGraw-Hill: New York, U.S.A., 1987.
7. Zanger, M.; Gennaro, A. R.; McKee, J. R., Electrophilic aromatic substitution of benzene. *Chem. Educ.* **1993**, *70*, (12), 985-987.
8. Gorgas, K.; Teigler, A.; Komlijenovic, D.; Just, W. W., The ether lipid-deficient mouse: Tracking down plasmalogen functions. *Biochim. Biophys. Acta* **1763**, *12*, 1511-1526.
9. Moser, A.; Steinberg, S. J.; Watkins, P.; Moser, H. W.; Ramaswamy, K.; Siegmund, K. D.; Lee, D. R.; Ely, J. J.; Ryder, O. A.; Hacia, J., Human and great ape red blood cells differ in plasmalogen levels and composition. *Lipids. Health. Dis.* **2011**, *10*, (1), 101.
10. Said, E. A.; Dupuy, F. P.; Trautmann, L.; Zhang, Y.; Shi, Y.; El-Far, M.; Hill, B. J.; Noto, A.; Ancuta, P.; Peretz, Y.; Fonseca, S. G.; Van Grevenynghe, J.; Boulassel, M. R.; Bruneau, J.; Shoukry, N. H.; Routy, J.-P.; Douek, D. C.; Haddad, E. K.; Sekaly, R.-P.,

140    Programmed death-1–induced interleukin-10 production by monocytes impairs CD4<sup>+</sup> T cell  
141    activation during HIV infection. *Nat. Med.* **2010**, *16*, 452-459.  
142    11.    Talaro, K. P., *Foundations in Microbiology*. 6th ed.; McGraw Hill: New York, U.S.A.,  
143    1994.  
144
